# Supplementary material for: Electrospun nanofiber SLIPS exhibiting high total transparency and scattering
Source: Royal Society of Chemistry journal article supplement (doi:10.1039/c6ra00276e), 2016-01-01
Supplement: c6ra00276e1.pdf [file c6ra00276e1.pdf]

## Supporting Information

### Electrospun nanofiber SLIPS exhibiting high total transparency and Scattering

Junichiro Abe<sup>a</sup>, Mizuki Tenjimbayashi<sup>a</sup> and Seimei Shiratori<sup>a†\*</sup>

---

a. Department of Integrated Design Engineering, Faculty of Science and Technology, Keio University, 3-14-1 Hiyoshi, Kohoku-ku, Yokohama, Kanagawa 223-8522 Japan

† Corresponding Author

\* [shiratori@appi.keio.ac.jp](mailto:shiratori@appi.keio.ac.jp)

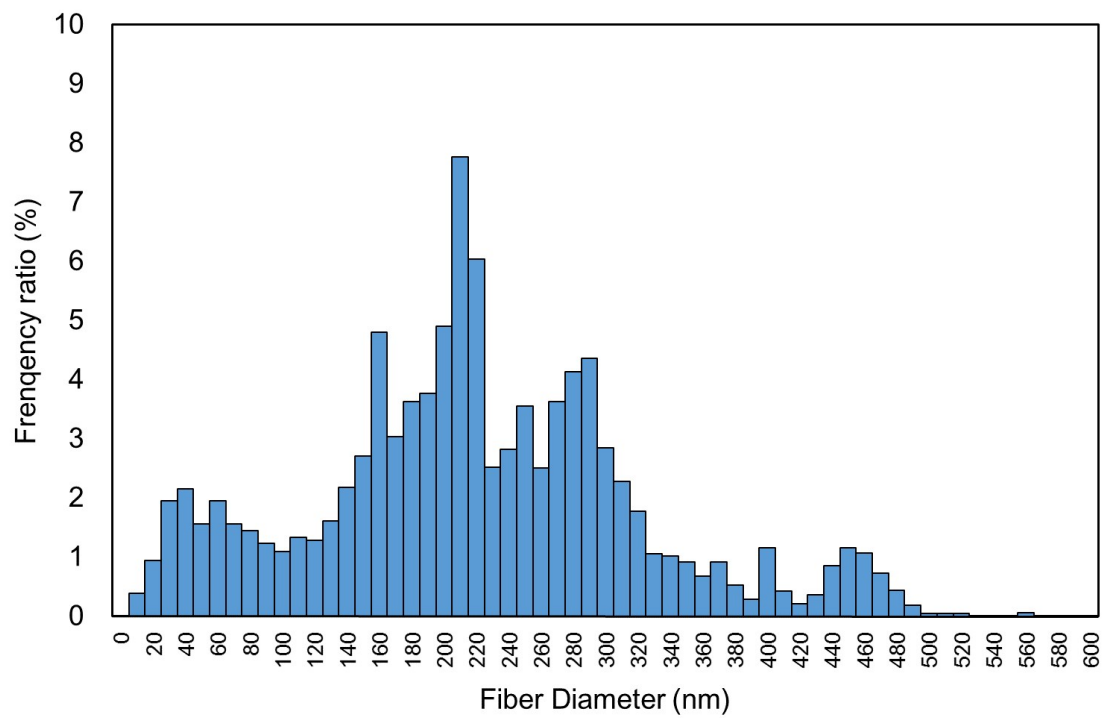

Fig. S1 Fiber diameter histogram of PVDF-HFP under layer

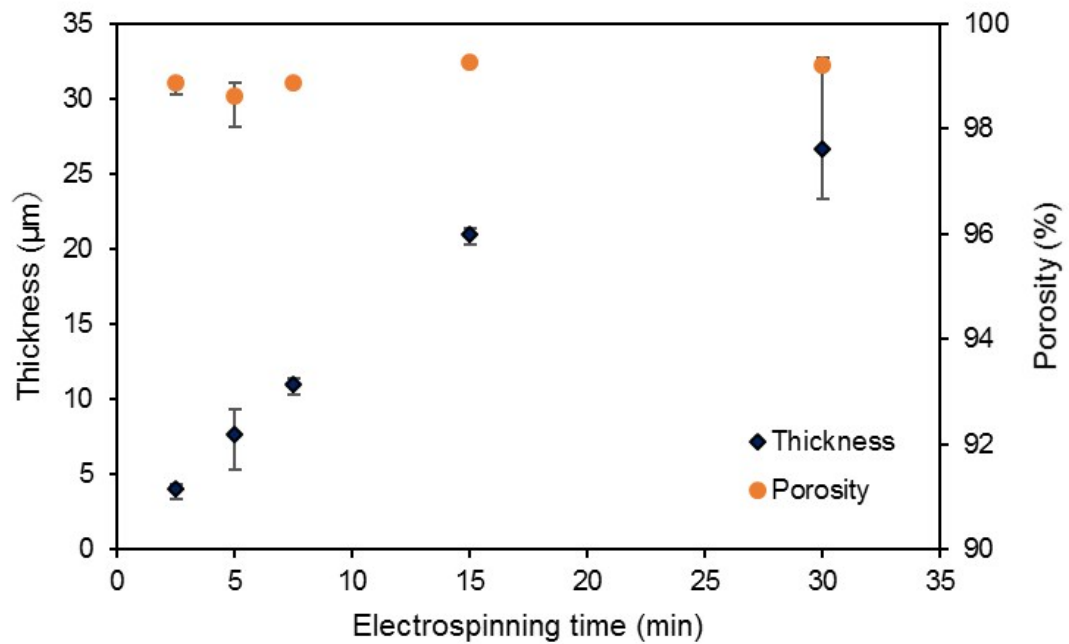

Fig. S2 Thickness and Porosity of PVDF-HFP under layer
